# Supplementary material for: Low-level expression of SAMHD1 in acute myeloid leukemia (AML) blasts correlates with improved outcome upon consolidation chemotherapy with high-dose cytarabine-based regimens
Source: PubMed Central journal article supplement (PMC6195559; doi:10.1038/s41408-018-0134-z), 2018-10-19

**A**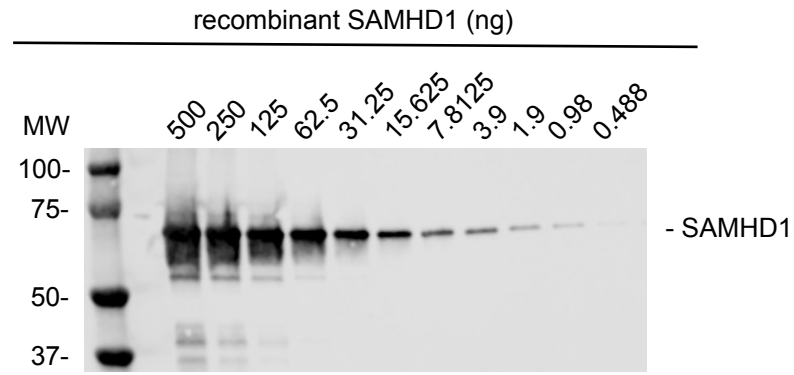**B**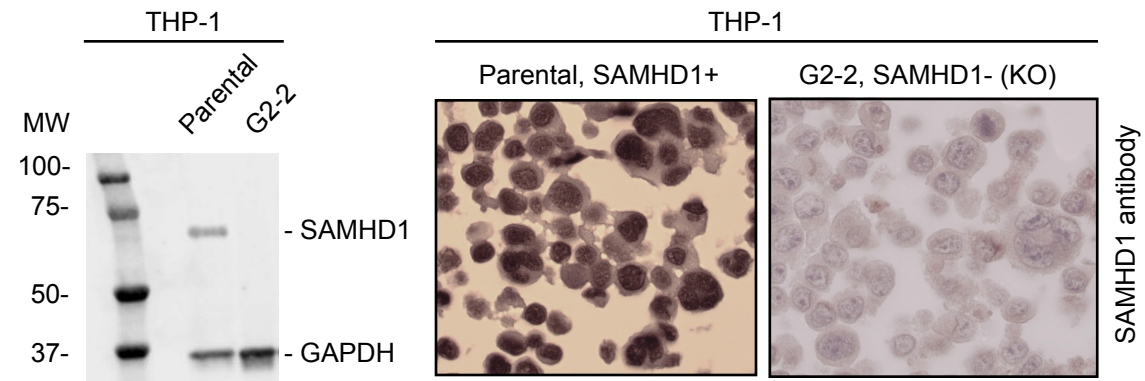**C**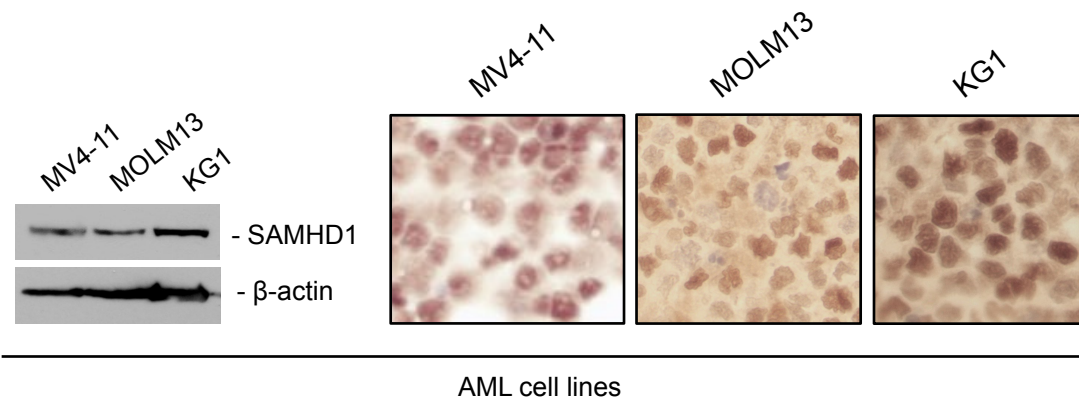

Supplement: 41408_2018_134_MOESM1_ESM.pdf [file 41408_2018_134_MOESM1_ESM.pdf]
